# Supplementary material for: Automated Electronic Alert for the Care and Outcomes of Adults With Acute Kidney Injury: A Randomized Clinical Trial
Source: PubMed Central journal article supplement (PMC10799260; doi:10.1001/jamanetworkopen.2023.51710), 2024-01-19
Supplement: jamanetwopen-e2351710-s003.pdf [file jamanetwopen-e2351710-s003.pdf]

## Data Sharing Statement

Li. Automated Electronic Alert for the Care and Outcomes of Adults With Acute Kidney Injury. *JAMA Netw Open*. Published January 19, 2024. doi:10.1001/jamanetworkopen.2023.51710

### Data

**Data available:** No
